# Supplementary material
Source: PubMed Central journal article supplement (PMC10257283)

# Neonatal unit floor plans pre- and post-renovation at the five hospitals in Uganda

## Entebbe Regional Referral Hospital: floor plan pre-renovation

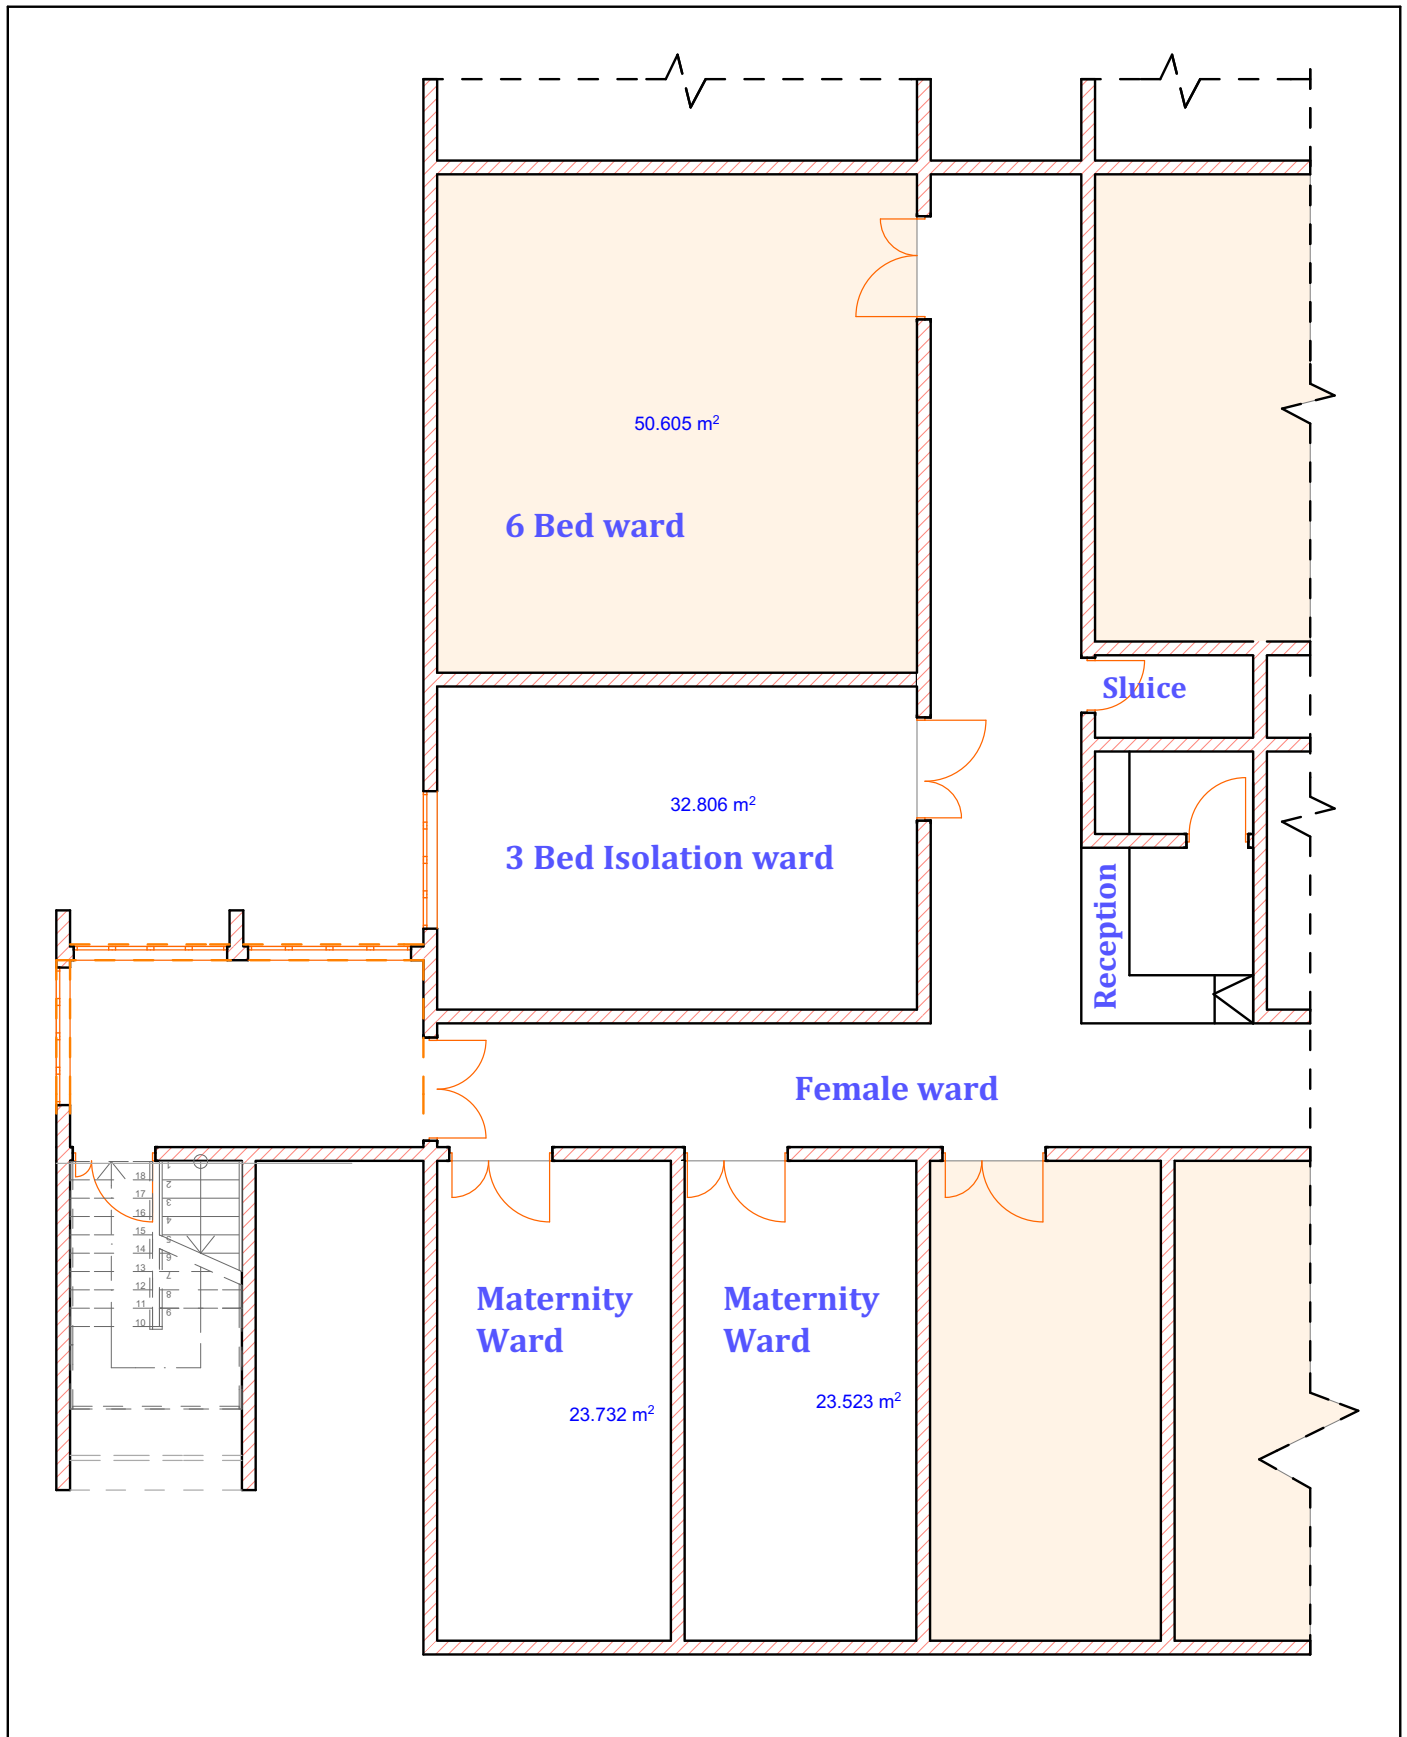

**PROPOSED MODIFICATIONS LAYOUT**

**LEGEND**

- ① Initial Stabilisation/assessment for randomisation
- ② Care for Intervention arm while unstable and in KMC
- ③ Care for control arm while unstable
- ④ Care for intervention/Contract arms when stable

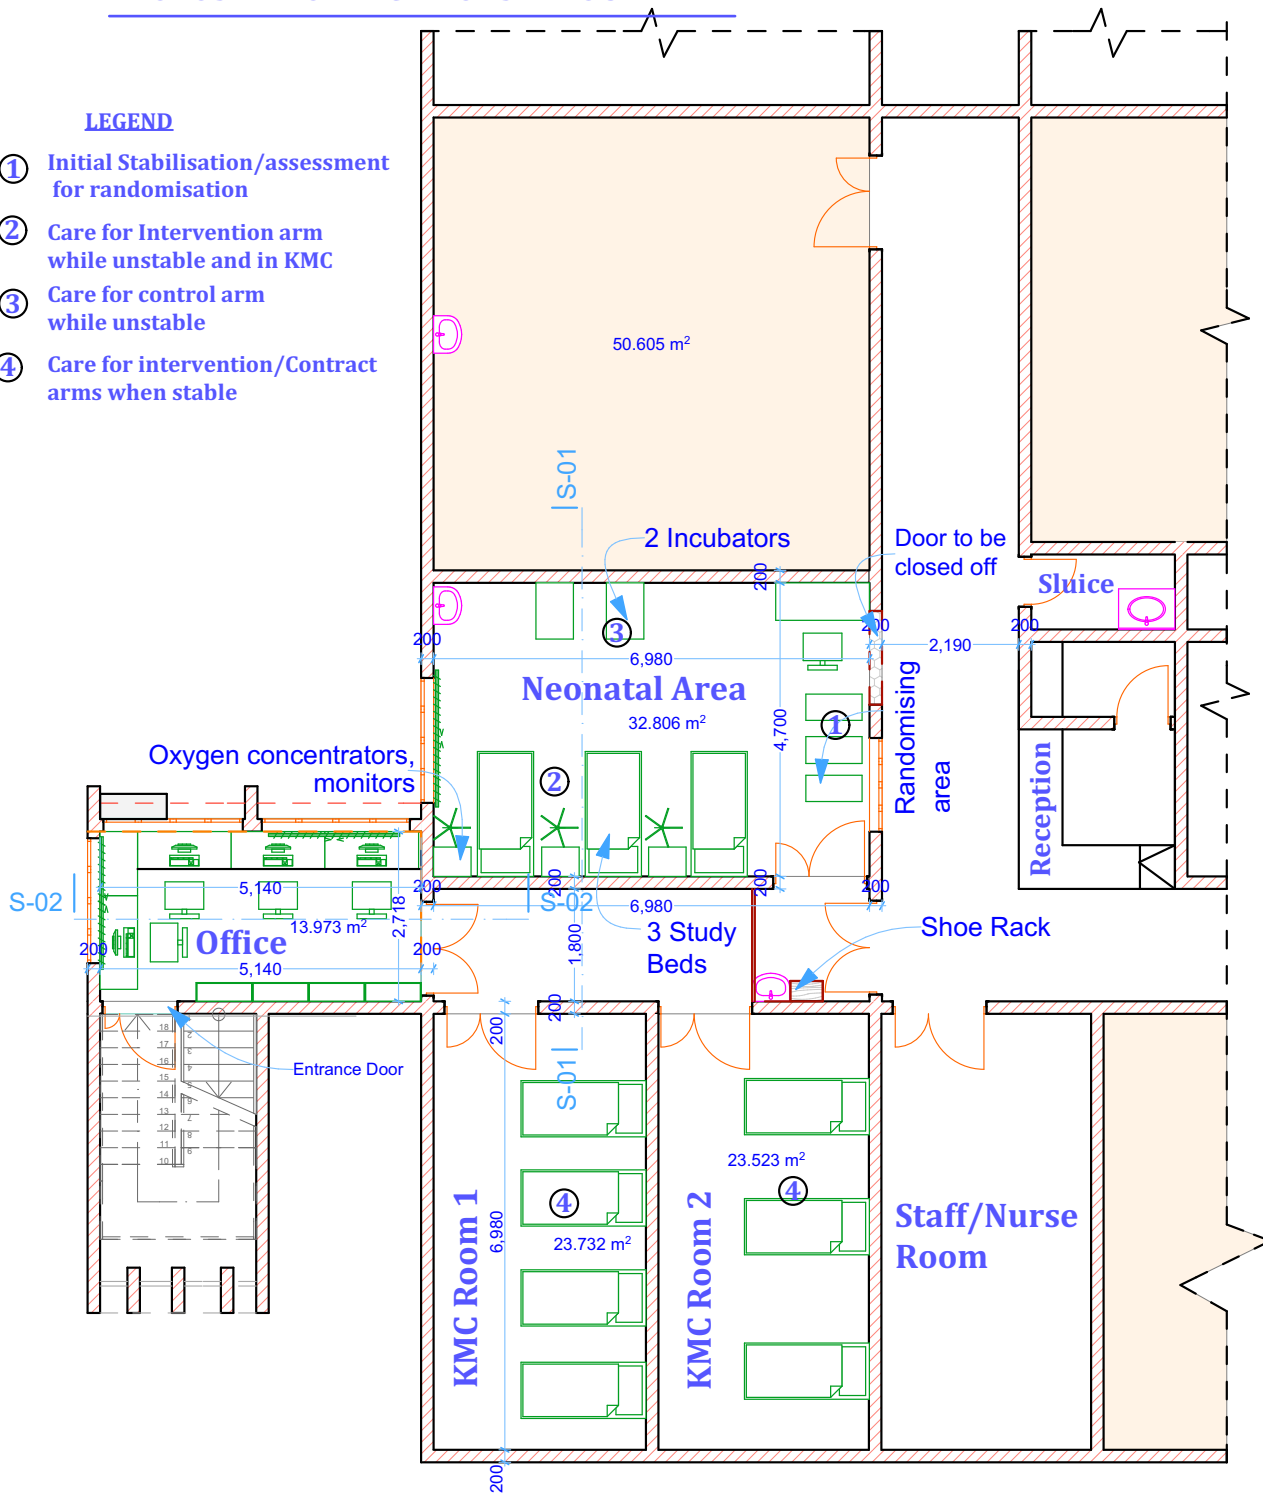

|                      |              |             |          |
|----------------------|--------------|-------------|----------|
| drawing title        |              |             |          |
| <b>PROPOSED PLAN</b> |              |             |          |
| issue type           | scale        | paper size  |          |
| <b>CONSTRUCTION</b>  | <b>1:100</b> | <b>A</b>    |          |
| project no.          | discipline   | drawing no. | revision |

|                                             |
|---------------------------------------------|
| project                                     |
| <b>PROPOSED NEONATAL MODIFICATION WORKS</b> |
| project address                             |
| <b>ENTEBBE HOSPITAL (GRADE A)</b>           |
| client                                      |
| <b>MRC/UVRI &amp; LSHTM UNIT ON AIDS</b>    |

MRC/UVRI and LSHTM Uganda Research Unit

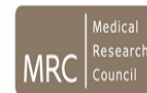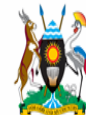

Uganda Virus Research Institute

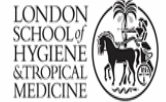

**Iganga District Hospital:  
floor plan pre-renovation**

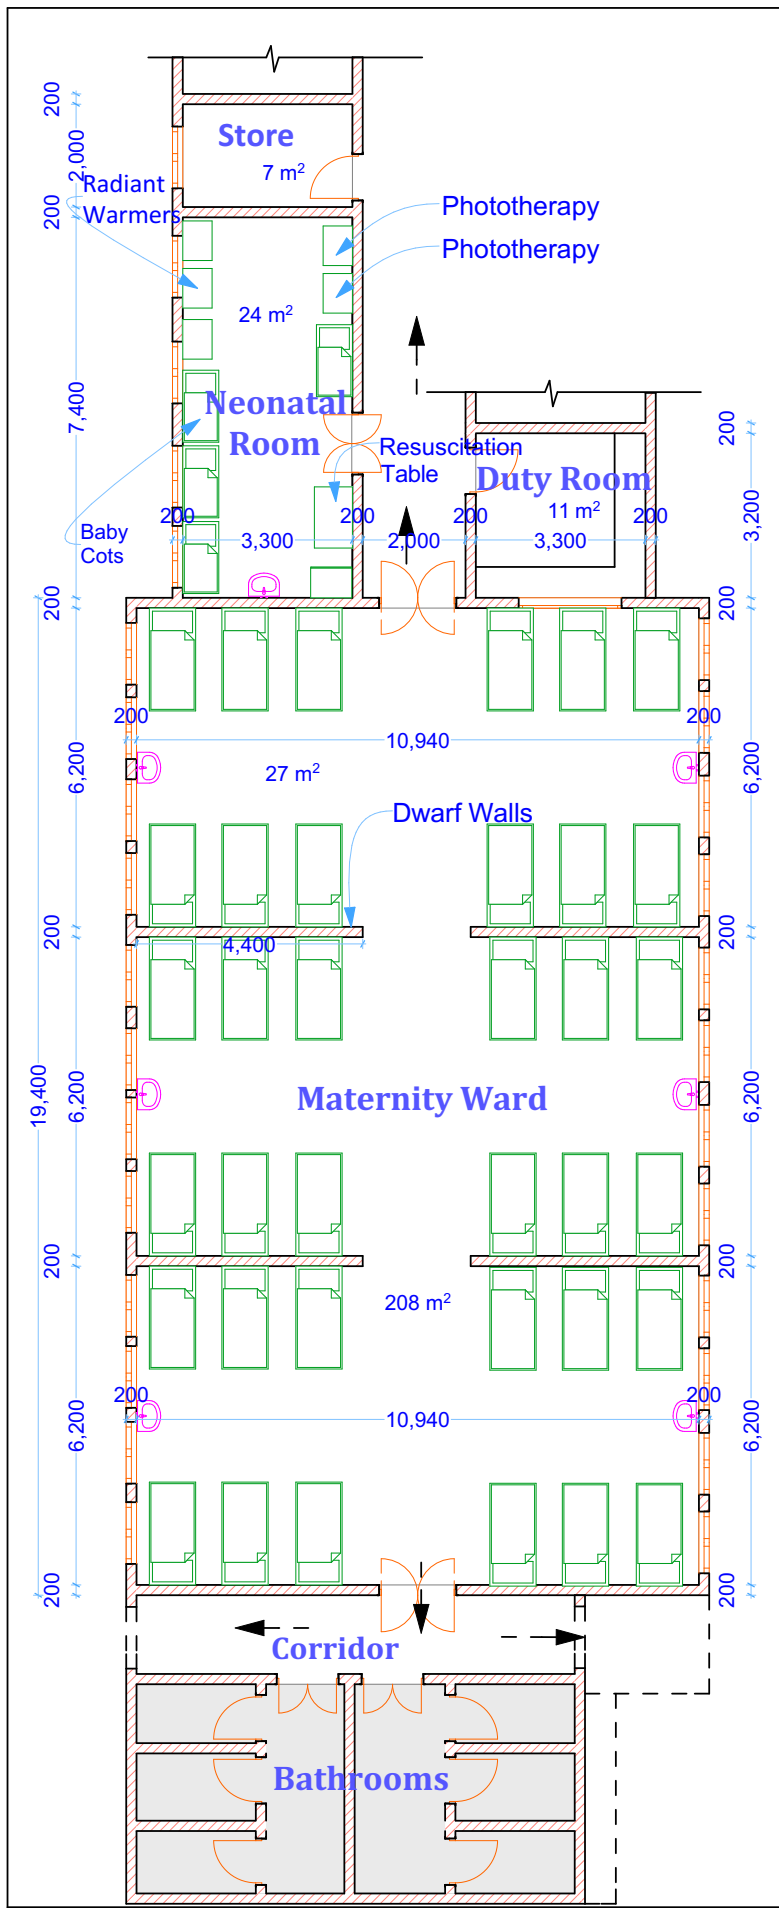

|                                       |            |                       |                                                            |  |
|---------------------------------------|------------|-----------------------|------------------------------------------------------------|--|
| drawing title<br><b>PROPOSED PLAN</b> |            |                       | project<br><b>PROPOSED NEONATAL<br/>MODIFICATION WORKS</b> |  |
| issue type<br><b>CONSTRUCTION</b>     |            | scale<br><b>1:100</b> | paper size<br><b>A</b>                                     |  |
| project no.                           | discipline | drawing no.           | project address<br><b>IGANGA HOSPITAL</b>                  |  |
|                                       |            | revision              | client<br><b>MRC/UVRI &amp; LSHTM UNIT ON AIDS</b>         |  |

**Iganga District Hospital: floor plan post-renovation**

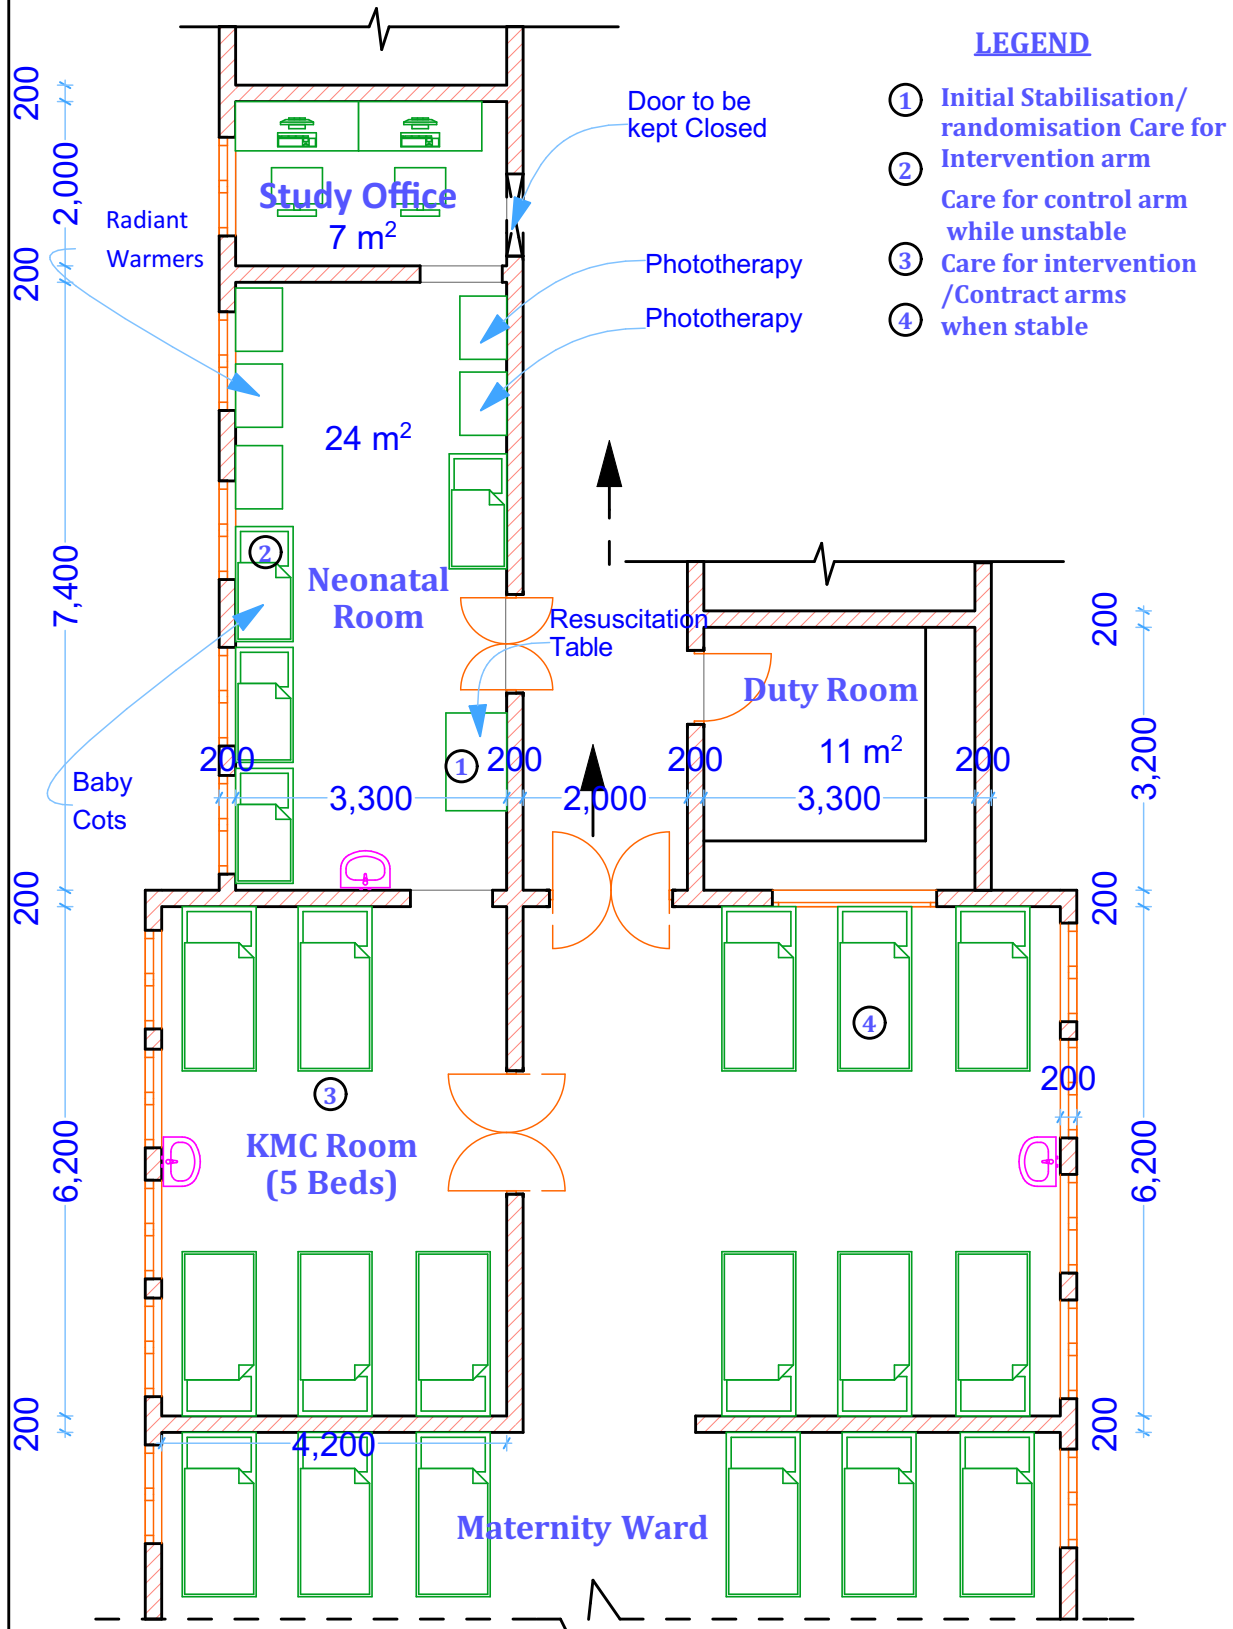

|                     |              |             |                                         |  |
|---------------------|--------------|-------------|-----------------------------------------|--|
| drawing title       |              |             | project                                 |  |
| PROPOSED PLAN       |              |             | PROPOSED NEONATAL<br>MODIFICATION WORKS |  |
| issue type          | scale        | paper size  | project address                         |  |
| <b>CONSTRUCTION</b> | <b>1:100</b> | <b>A</b>    | IGANGA HOSPITAL                         |  |
| project no.         | discipline   | drawing no. | client                                  |  |
|                     |              |             | MRC/UVRI & LSHTM UNIT ON AIDS           |  |

Jinja Regional Referral Hospital: floor pre-renovation

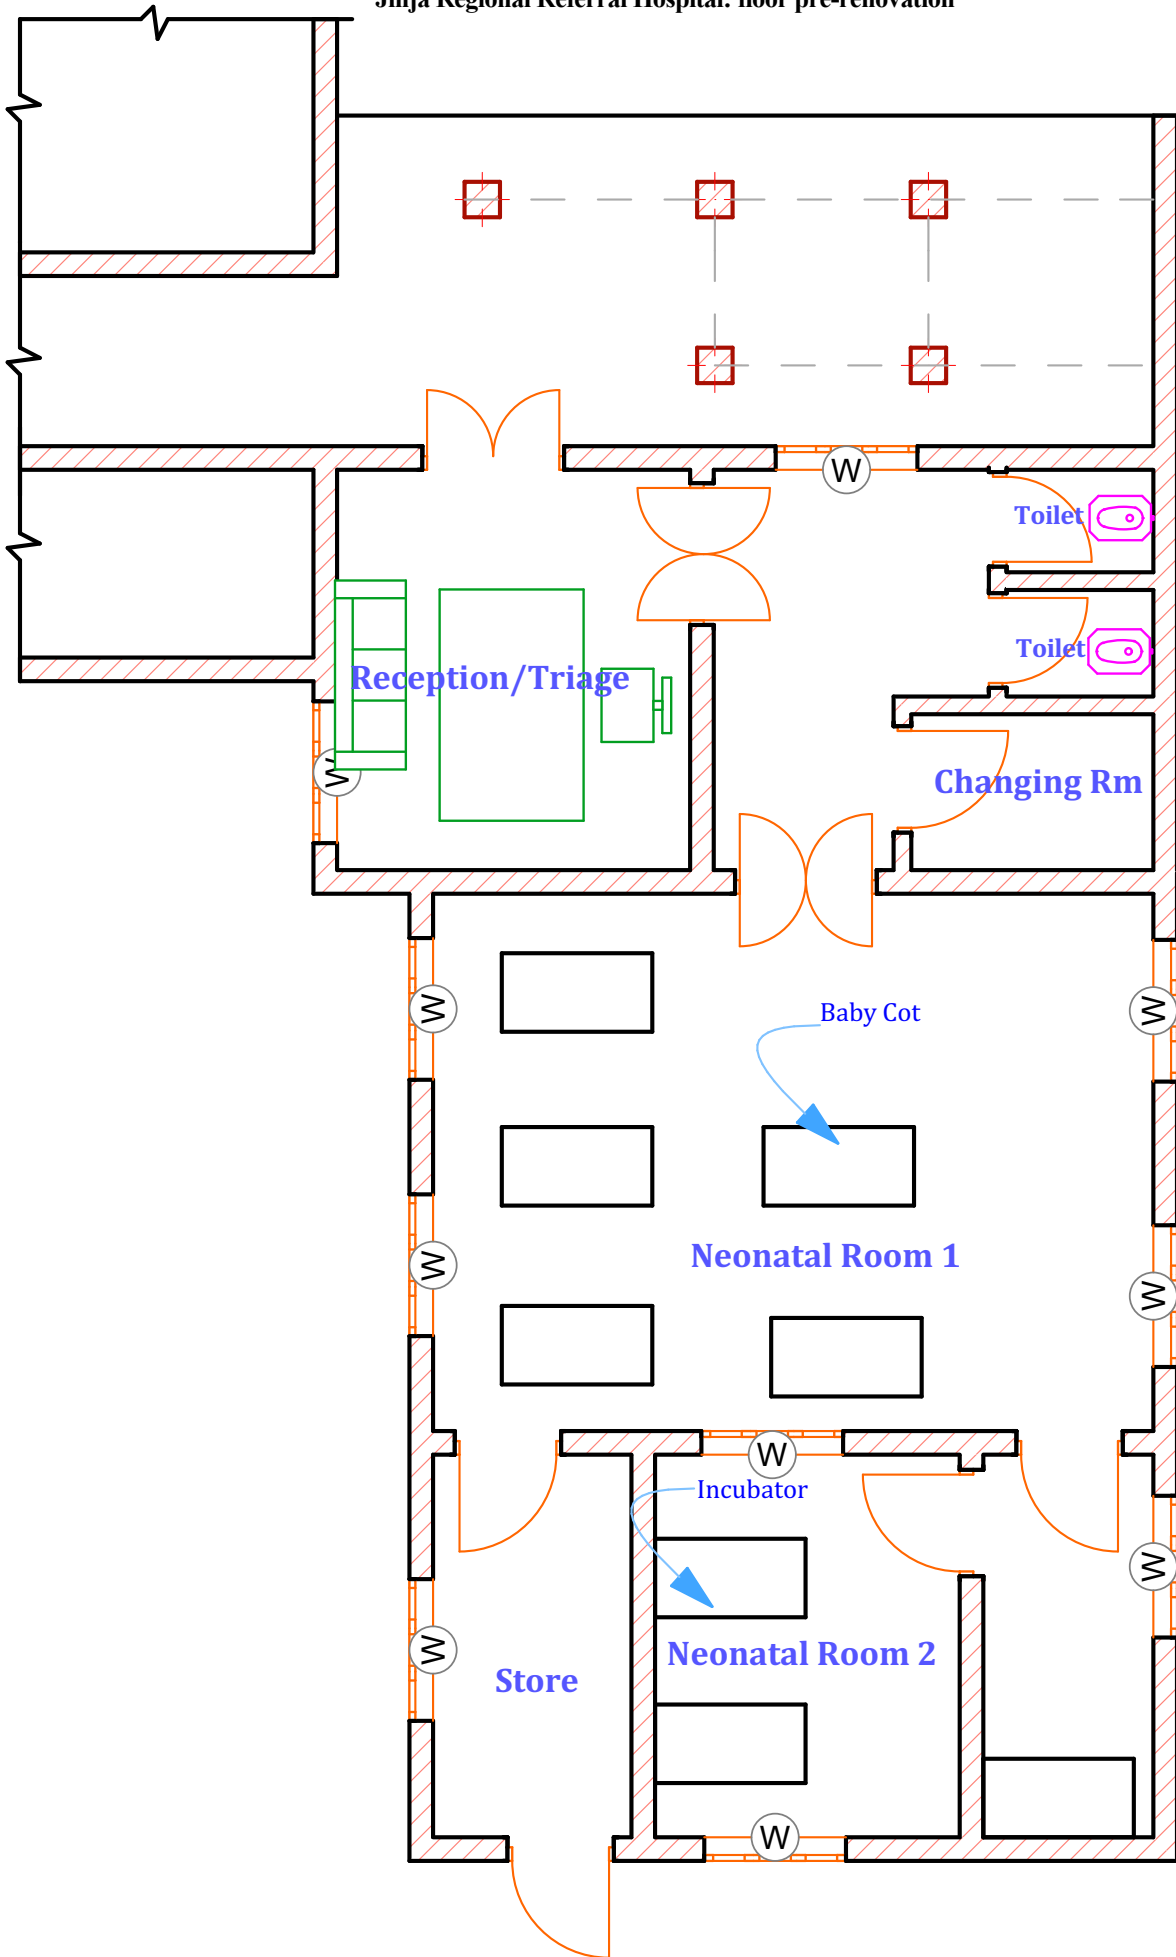

**Jinja Regional Referral Hospital: floor plan post-renovation**

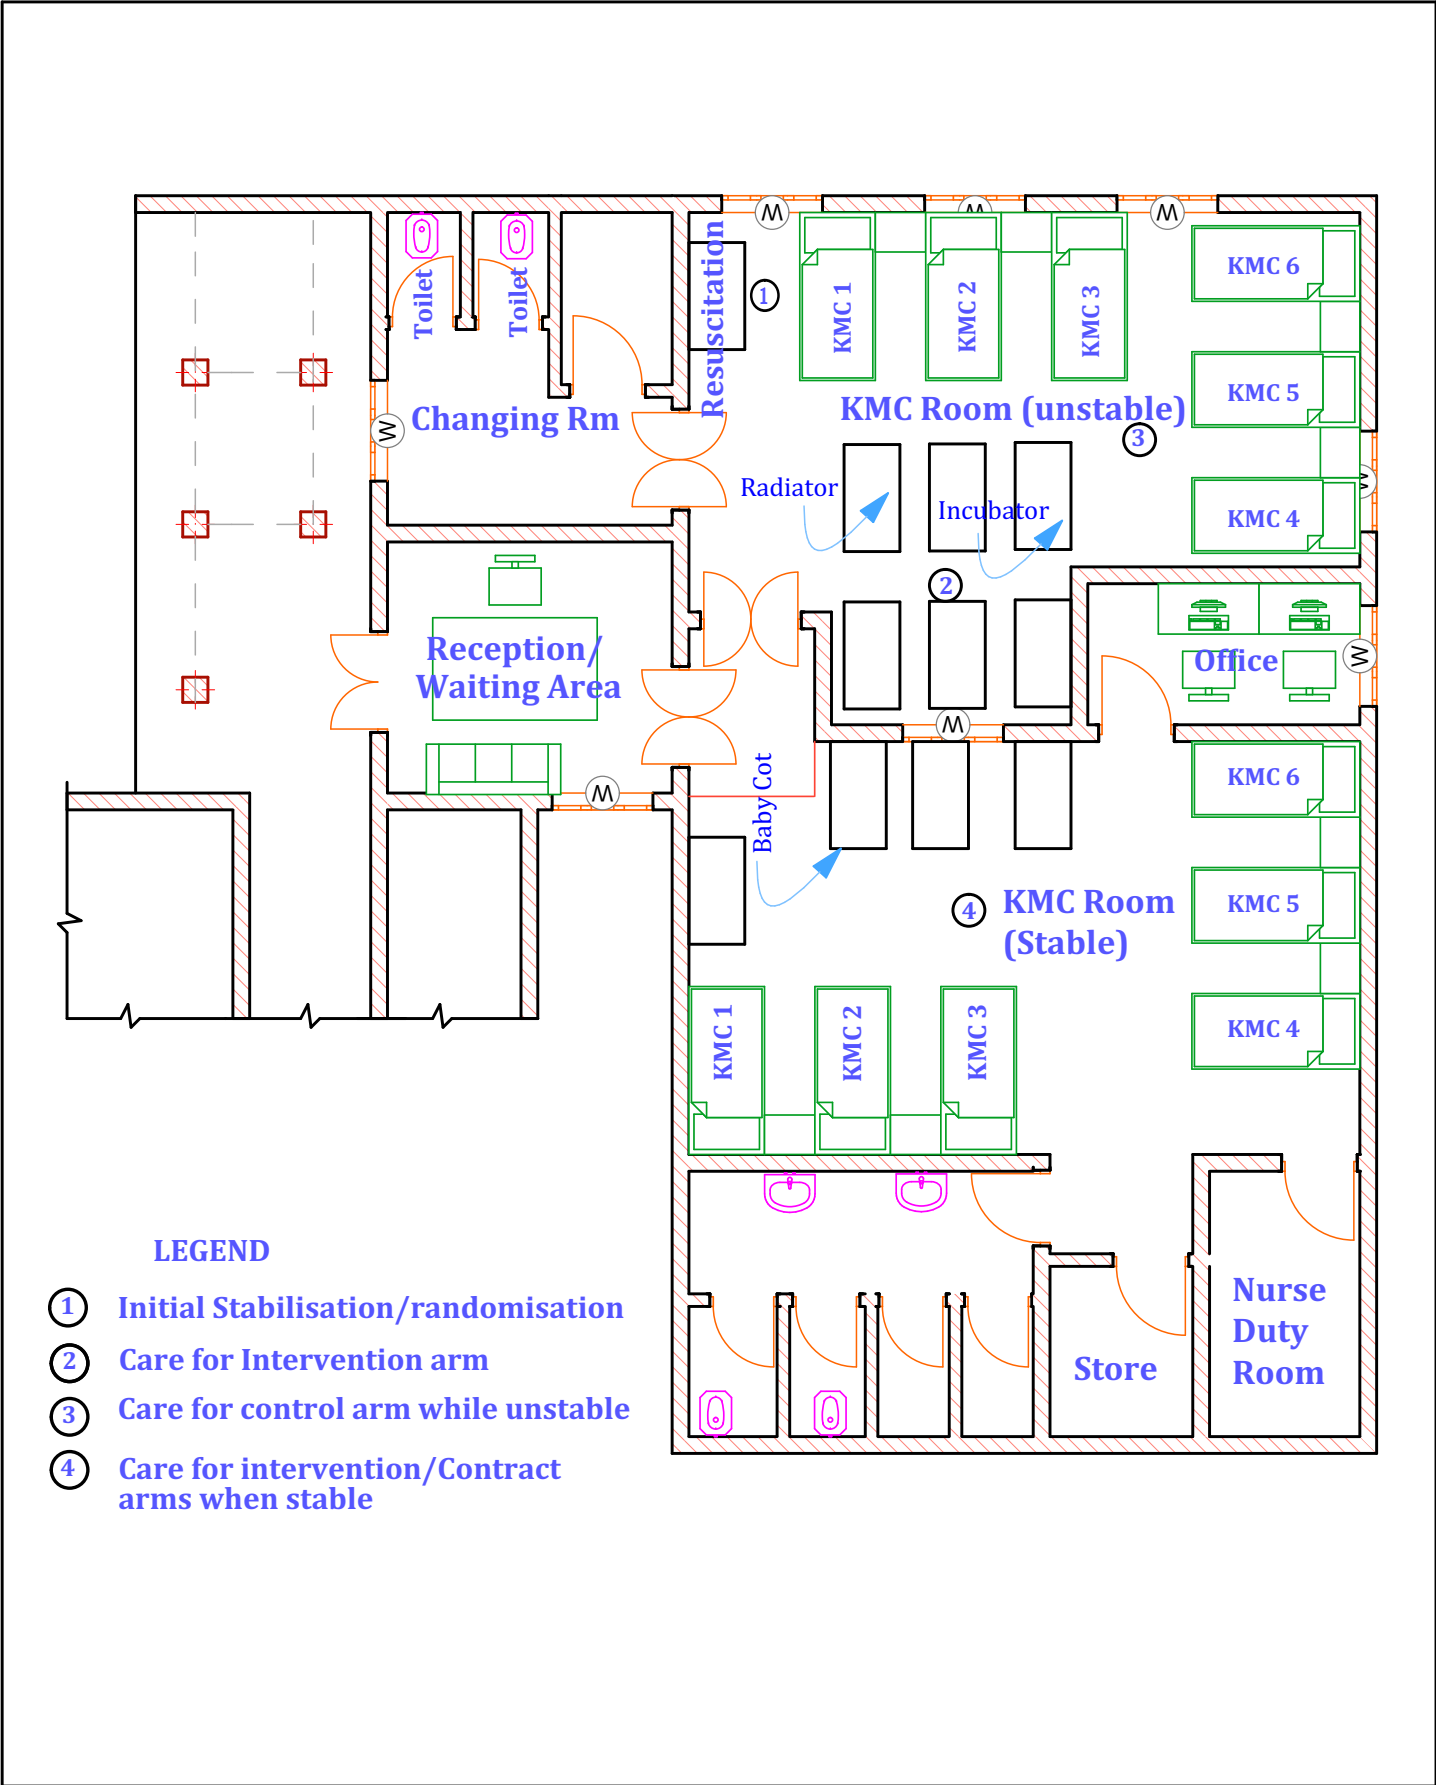

# Kawempe National Referral Hospital: floor plan pre-renovation

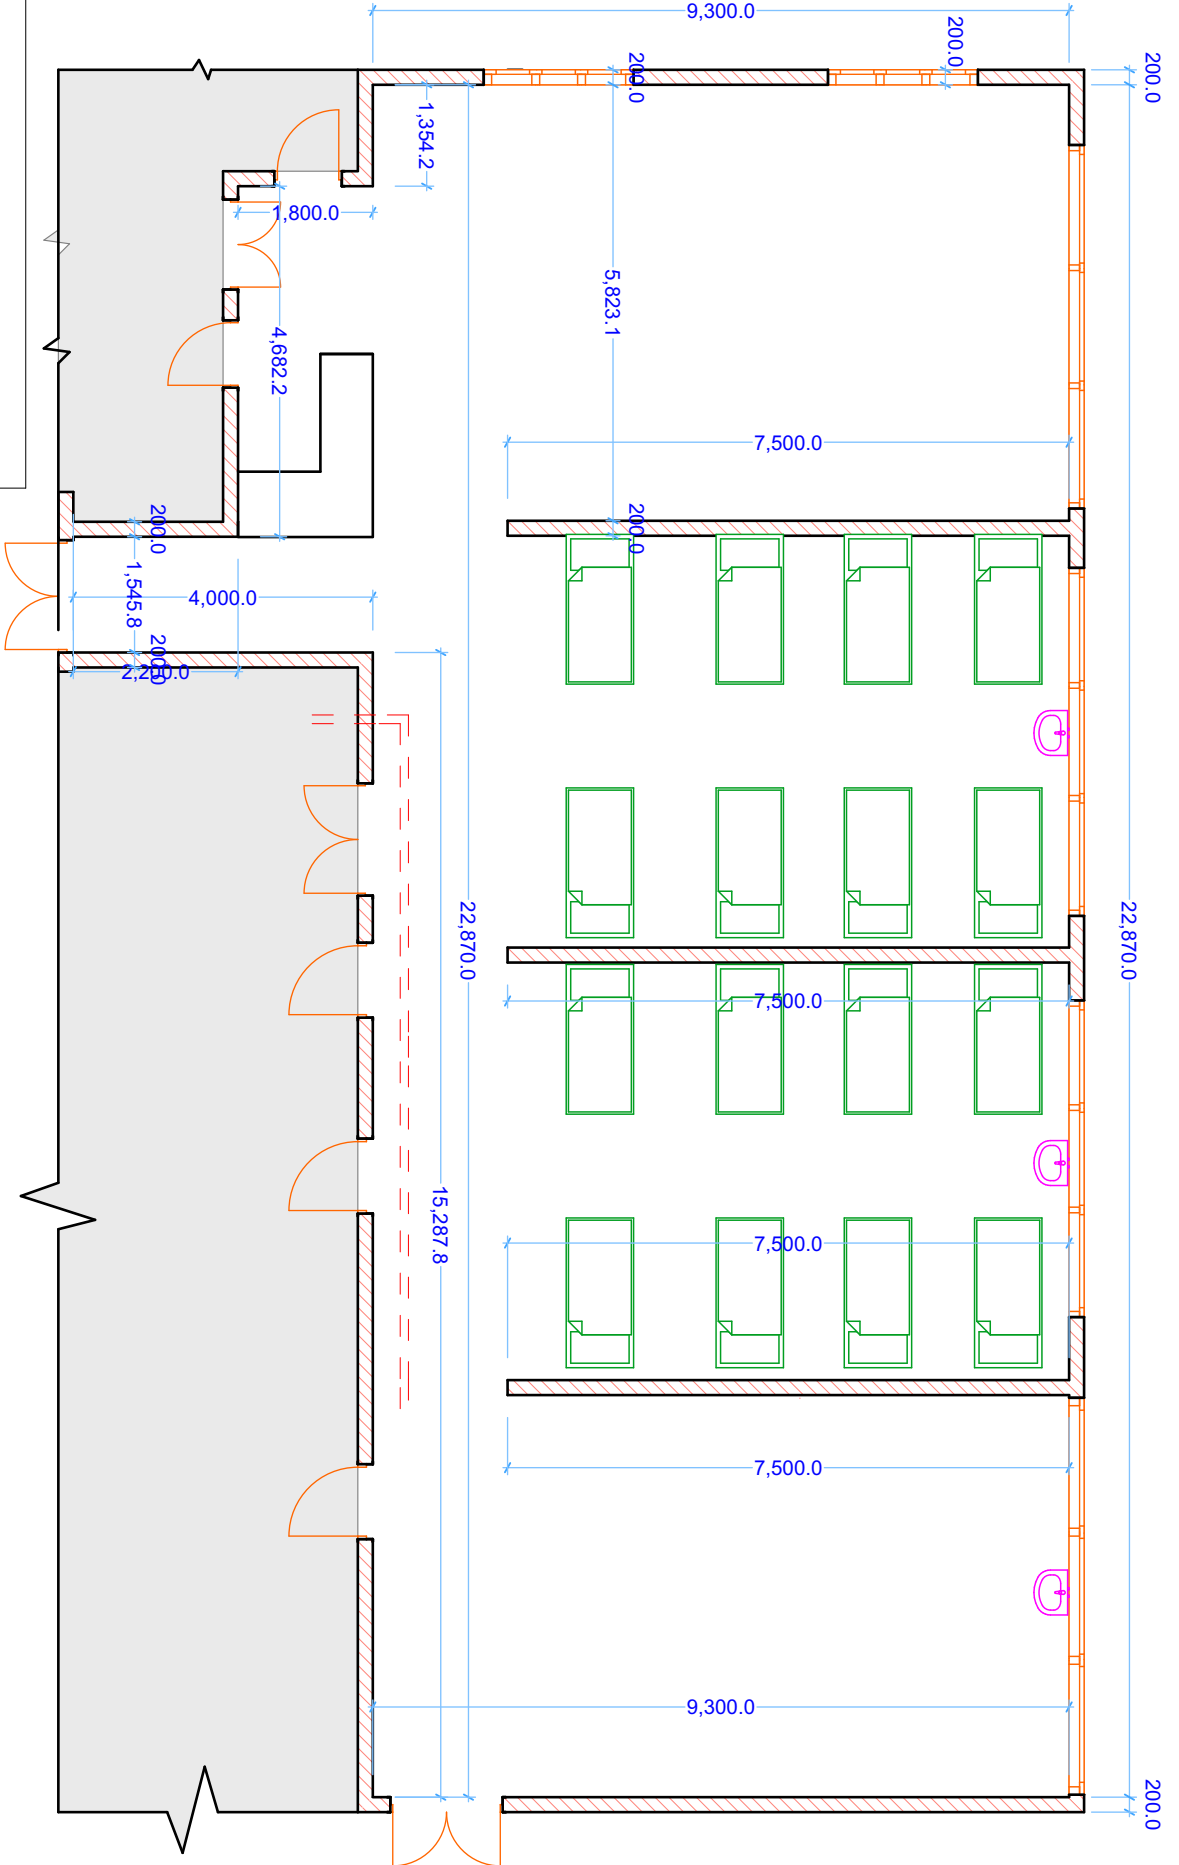

## Existing Layout

Issue type: **Rehabilitation Works**

Scale: **1:100**

Project no.: **A**

Discipline: **Rehabilitation Works**

Drawing no.: **1:100**

Revision: **A**





Masaka Regional Referral Hospital: floor plan pre-renovation

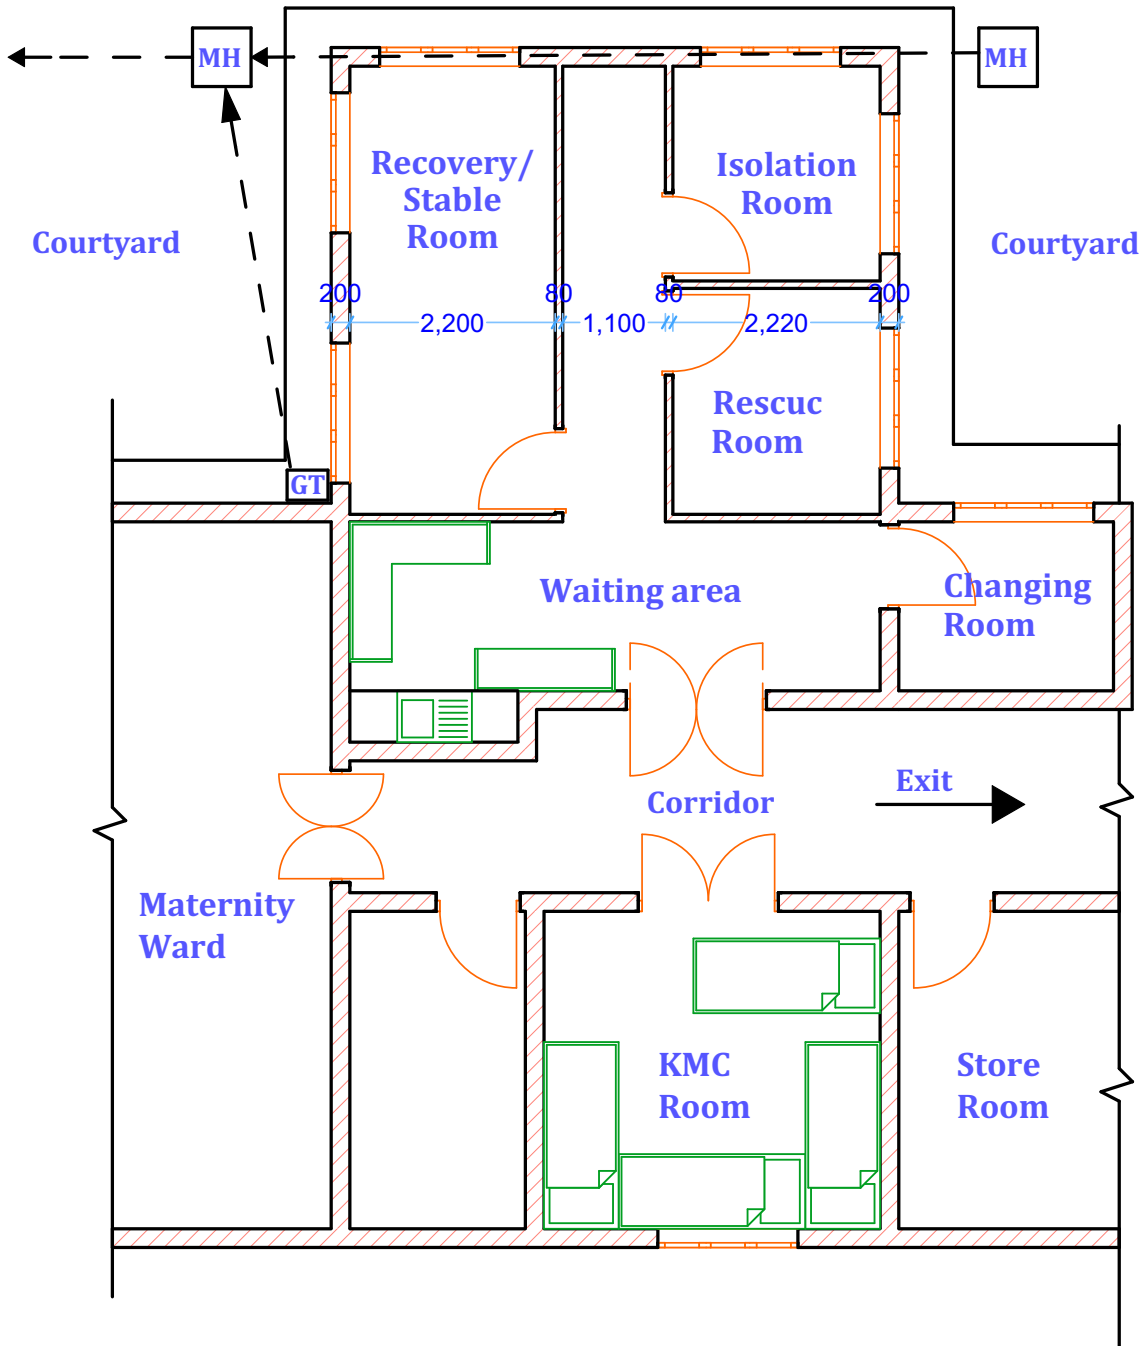

|                              |            |              |                                             |                                          |  |
|------------------------------|------------|--------------|---------------------------------------------|------------------------------------------|--|
| drawing title                |            |              | project                                     |                                          |  |
| <b>EXISTING FLOOR LAYOUT</b> |            |              | <b>PROPOSED NEONATAL MODIFICATION WORKS</b> |                                          |  |
| issue type                   |            | scale        | paper size                                  | project address                          |  |
| <b>CONSTRUCTION</b>          |            | <b>1:100</b> | <b>A</b>                                    | <b>MASAKA HOSPITAL</b>                   |  |
| project no.                  | discipline | drawing no.  | revision                                    | client                                   |  |
|                              |            |              |                                             | <b>MRC/UVRI &amp; LSHTM UNIT ON AIDS</b> |  |

Masaka Regional Referral Hospital: floor plan post-renovation

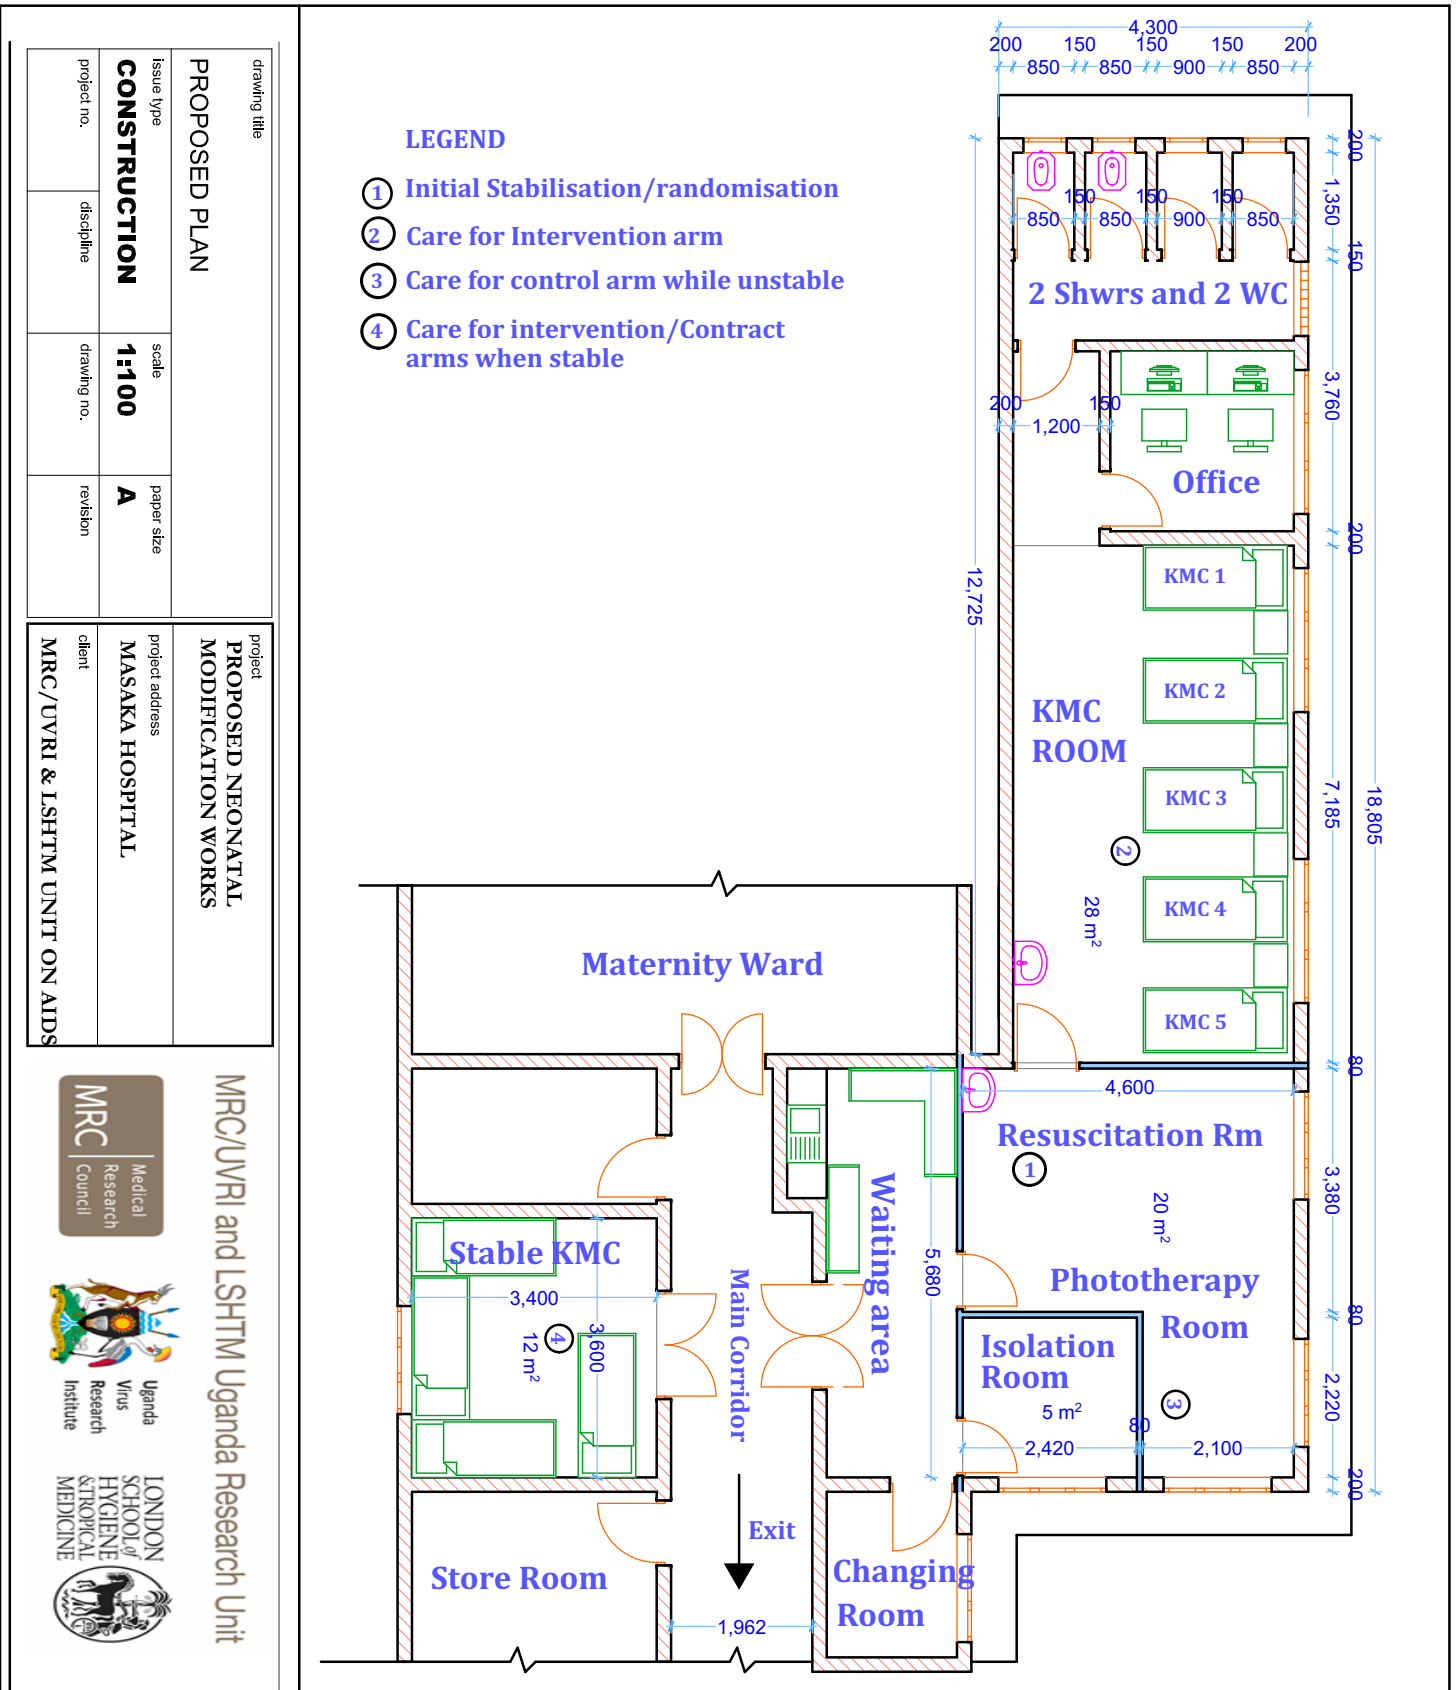

Supplement: 12913_2023_9624_MOESM3_ESM.pdf [file 12913_2023_9624_MOESM3_ESM.pdf]
